# Supplementary material
Source: PubMed Central journal article supplement (PMC5446144)
Supplement: UEG671077_Sup_table1.pdf [file UEG671077_Sup_table1.pdf]

Supplementary table 1. Detailed local complications according to tertiles of fluid bolus administration in the emergency room (FVER)

| <b>FVER</b>        | <b>APFC</b>      | <b>Pancreatic<br/>necrosis</b> | <b>Peripancreatic<br/>necrosis</b> |
|--------------------|------------------|--------------------------------|------------------------------------|
| <b>&lt;500 ml</b>  |                  |                                |                                    |
| Cases              | 31/269 (11.5%)   | 13/269 (4.8%)                  | 23/269 (8.6%)                      |
| OR (95%CI)         | 1                | 1                              | 1                                  |
| ORa (95%CI)        | 1                | 1                              | 1                                  |
| <b>500-1000 ml</b> |                  |                                |                                    |
| Cases              | 37/427 (8.7%)    | 11/427 (2.6%)                  | 17/427 (4%)                        |
| OR (95%CI)         | 0.73 (0.44-1.21) | 0.52 (0.23-1.18)               | 0.44 (0.23-0.85) *                 |
| ORa (95%CI)        | 0.87 (0.52-1.47) | 0.63 (0.27-1.46)               | 0.64 (0.32-1.28)                   |
| <b>&gt;1000 ml</b> |                  |                                |                                    |
| Cases              | 40/314 (12.7%)   | 12/314 (3.8%)                  | 9/314 (2.9%)                       |
| OR (95%CI)         | 1.12 (0.68-1.85) | 0.78 (0.35-1.75)               | 0.32 (0.14-0.7) *                  |
| ORa (95%CI)        | 1.46 (0.84-2.51) | 1 (0.4-2.49)                   | 0.8 (0.32-2.03)                    |

Reference group for comparisons: <500 ml. Cases: expressed as number of cases with local complication/number of patients within the category of fluid administration (% cases within category of fluid administration). APFC: Acute Peripancreatic Fluid Collections. \*: p<0.025 vs reference group in univariate analysis. OR: Odds Ratio. ORa: adjusted OR. Fifty-nine patients had missing data regarding local complications (5.8%). Variables included in the multivariate

analysis: age>60, alcoholic etiology, hematocrit>44%, blood urea nitrogen>25 mg/dl and presence of systemic inflammatory response syndrome.
