# Supplementary material
Source: PubMed Central journal article supplement (PMC5446144)
Supplement: UEG671077_Sup_table2.pdf [file UEG671077_Sup_table2.pdf]

Supplementary table 2. Baseline characteristics according to center of origin

|                       | HGUA<br>(n=231) | DHMC<br>(n=410) | UPMC<br>(n=178) | JHMI<br>(n=191) | p      |
|-----------------------|-----------------|-----------------|-----------------|-----------------|--------|
| <b>Age</b>            | 60.8 (18)       | 52.5 (20.8)     | 49.4 (17.9)     | 48.6 (14.3)     | <0.001 |
| <b>Male</b>           | 114 (49.4%)     | 196 (47.8%)     | 86 (48.3%)      | 112 (58.6%)     | 0.082  |
| <b>Etiology</b>       |                 |                 |                 |                 | <0.001 |
| Gallstones            | 143 (61.9%)     | 147 (35.9%)     | 49 (27.5%)      | 109 (57.1%)     |        |
| Alcohol               | 28 (12.1%)      | 67 (16.3%)      | 21 (11.8%)      | 23 (12%)        |        |
| Other                 | 60 (26%)        | 196 (47.8%)     | 108 (60.7%)     | 59 (30.9%)      |        |
| <b>BISAP≥3</b>        | 25 (10.8%)      | 11 (2.7%)       | 8 (4.5%)        | 3 (1.6%)        | <0.001 |
| <b>Hematocrit≥44%</b> | 94 (40.7%)      | 101 (24.6%)     | 48 (27%)        | 42 (22%)        | <0.001 |
| <b>BUN≥ 25mg/dl</b>   | 33 (14.3%)      | 62 (15.1%)      | 18 (10.1%)      | 19 (9.9%)       | 0.103  |
| <b>SIRS</b>           | 89 (38.5%)      | 110 (26.8%)     | 53 (29.8%)      | 95 (49.7%)      | <0.001 |

Centers: Hospital General Universitario de Alicante (HGUA), Johns Hopkins Medical Institutions (JHMI), University of Pittsburgh Medical Center (UPMC), Dartmouth-Hitchcock Medical Center (DHMC). Data are expressed as mean (SD) or number (%). BISAP: bedside index for severity of acute pancreatitis. BUN: blood urea nitrogen. SIRS: systemic inflammatory response syndrome.
