# Supplementary material
Source: PubMed Central journal article supplement (PMC5446144)
Supplement: UEG671077_Sup_table3.pdf [file UEG671077_Sup_table3.pdf]

Supplementary table 3. Outcomes stratified by center of origin

| Outcome variable           | All              | HGUA           | DHMC          | UPMC          | JHMI           | p      |
|----------------------------|------------------|----------------|---------------|---------------|----------------|--------|
| <b>Local complications</b> |                  |                |               |               |                |        |
| Cases                      | 149/1010 (14.8%) | 57/231 (24.7%) | 25/410 (6.1%) | 32/178 (18%)  | 35/191 (18.3%) | <0.001 |
| <b>POF</b>                 |                  |                |               |               |                |        |
| Cases                      | 53/1010 (5.2%)   | 13/231 (5.6%)  | 21/410 (5.1%) | 12/178 (6.7%) | 7/191 (3.7%)   | 0.606  |
| <b>Invasive treatment</b>  |                  |                |               |               |                |        |
| Cases                      | 25/1010 (2.5%)   | 11/231 (4.8%)  | 5/410 (1.2%)  | 8/178 (4.5%)  | 1/191 (0.5%)   | 0.003  |
| <b>Hospital stay</b>       |                  |                |               |               |                |        |
| Median (p25-p75)           | 6 (4-10)         | 9.1 (6-14)     | 6 (4-10)      | 6 (4-9)       | 4 (2-6)        | <0.001 |
| <b>Death</b>               |                  |                |               |               |                |        |
| Cases                      | 23/1010 (2.3%)   | 6/231 (2.6%)   | 14/410 (3.4%) | 3/178 (1.7%)  | 0              | 0.065  |

Cases are expressed as the number of patients with the outcome variable/total number of patients (%).POF: persistent organ failure.
